# Supplementary material for: Fractionation of Regenerated Silk Fibroin and Characterization of the Fractions
Source: Molecules. 2021 Oct 19;26(20):6317. doi: 10.3390/molecules26206317 (PMC8540890; doi:10.3390/molecules26206317)
Supplement: Supplementary file 1 [file molecules-26-06317-s001.zip › molecules-1421118-supplementary.pdf]

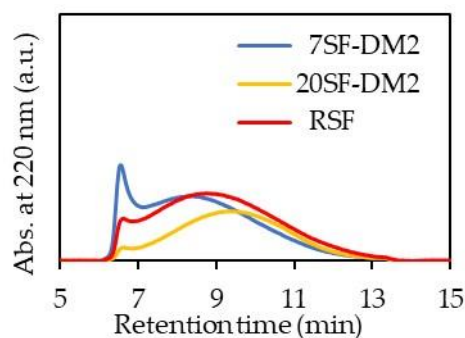

**Figure S1.** GPC elution profiles of SFs (7SF-DM2, 20SF-DM2) fractionated by DM with 7% and 20% of saturated concentration AS and RSF for use in fabrication experiments.

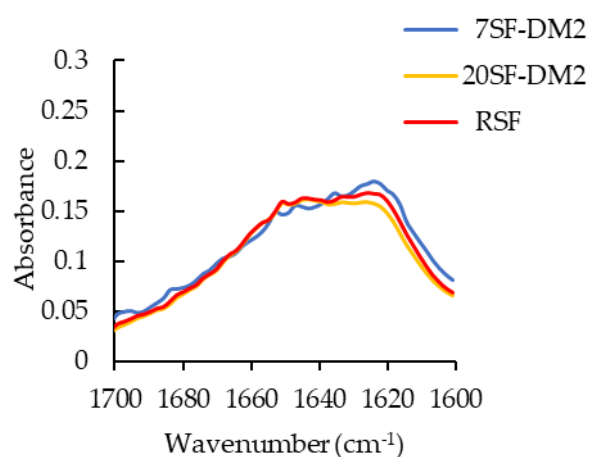

**Figure S2.** Amide I region in ATR-FTIR spectra of electrospun nanofiber nonwoven mat from fractionated SF.

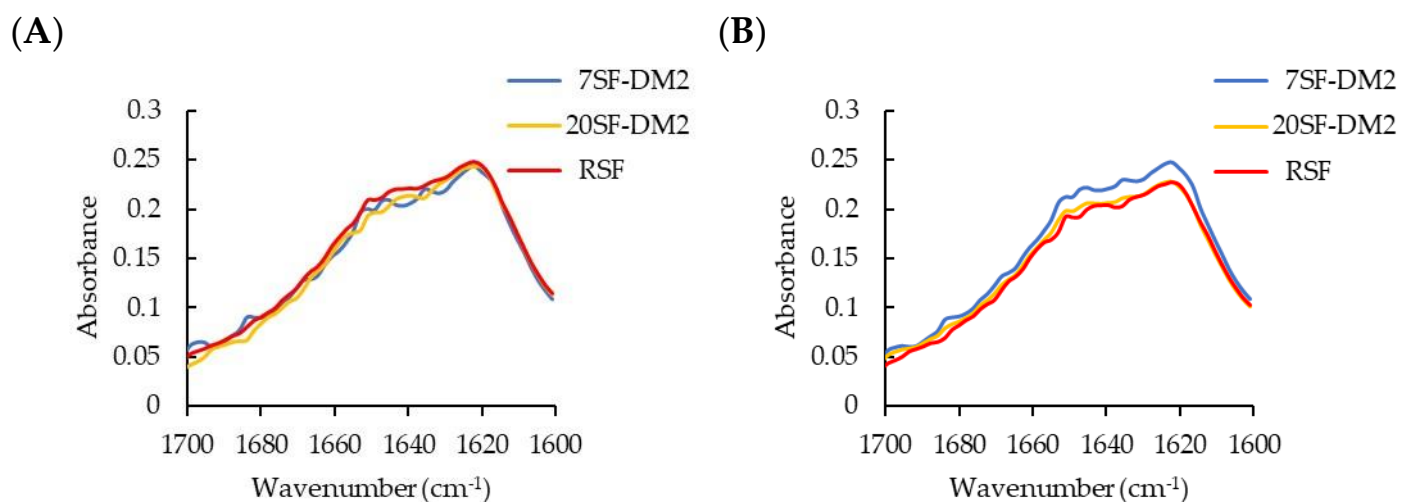

**Figure S3.** Amide I region in ATR-FTIR spectra of sponges fabricated from (A) 2% (w/v) and (B) 4% (w/v) of 7SF-DM2, 20SF-DM2, and RSF solutions.
